# Supplementary material for: The Association Between Engagement and Weight Loss Through Personal Coaching and Cell Phone Interventions in Young Adults: Randomized Controlled Trial
Source: PubMed Central journal article supplement (PMC6245957; doi:10.2196/10471), 2018-10-18
Supplement: mhealth_v6i10e10471_app2.pdf [file mhealth_v6i10e10471_app2.pdf]

Multimedia Appendix 2. Baseline characteristics of Cell Phone participants by quartile of mean number of apps used per day (including self-weighting)<sup>a</sup> in first six months

|                                 | First Quartile<br>(≤3.2) | Second<br>Quartile (>3.2<br>& ≤4.8) | Third Quartile<br>(>4.8 & ≤6.7) | Fourth<br>Quartile (>6.7) |
|---------------------------------|--------------------------|-------------------------------------|---------------------------------|---------------------------|
| Total, no.                      | 29                       | 28                                  | 29                              | 28                        |
| Age at Randomization<br>(years) |                          |                                     |                                 |                           |
| mean (SD)                       | 28.8 (4.3)               | 29.9 (4.4)                          | 29.0 (4.2)                      | 29.1 (3.8)                |
| median (Q1, Q3)                 | 28.6 (26.5,<br>31.4)     | 31.5 (27.5,<br>33.2)                | 29.6 (26.2,<br>32.4)            | 28.9 (26.9,<br>31.7)      |
| n (min, max)                    | 29 (19.2, 36.0)          | 28 (19.3, 35.2)                     | 29 (19.8, 35.3)                 | 28 (20.4, 35.7)           |
| Female, no. (%)                 | 12 (41.4)                | 22 (78.6)                           | 24 (82.8)                       | 21 (75.0)                 |
| Race Category, no. (%)          |                          |                                     |                                 |                           |
| White                           | 16 (55.2)                | 11 (39.3)                           | 15 (51.7)                       | 20 (71.4)                 |
| Black                           | 10 (34.5)                | 16 (57.1)                           | 10 (34.5)                       | 5 (17.9)                  |
| Other                           | 3 (10.3)                 | 1 (3.6)                             | 4 (13.8)                        | 3 (10.7)                  |
| Race, no. (%)                   |                          |                                     |                                 |                           |
| White                           | 16 (55.2)                | 11 (39.3)                           | 15 (51.7)                       | 20 (71.4)                 |
| Non-white                       | 13 (44.8)                | 17 (60.7)                           | 14 (48.3)                       | 8 (28.6)                  |
| Hispanic Ethnicity, no. (%)     | 2 (6.9)                  | 0 (0.0)                             | 2 (6.9)                         | 4 (14.3)                  |
| Education Level, no. (%)        |                          |                                     |                                 |                           |
| Some college or less            | 11 (37.9)                | 10 (35.7)                           | 7 (24.1)                        | 9 (32.1)                  |
| College Degree                  | 18 (62.1)                | 18 (64.3)                           | 22 (75.9)                       | 19 (67.9)                 |
| Income Category, no. (%)        |                          |                                     |                                 |                           |
| <24,999                         | 6 (21.4)                 | 10 (35.7)                           | 8 (28.6)                        | 11 (40.7)                 |
| 25,000 - 49,999                 | 14 (50.0)                | 12 (42.9)                           | 15 (53.6)                       | 10 (37.0)                 |

Multimedia Appendix 2. Baseline characteristics of Cell Phone participants by quartile of mean number of apps used per day (including self-weighting)<sup>a</sup> in first six months

|                                                                                                | First Quartile<br>(≤3.2)  | Second<br>Quartile (>3.2<br>& ≤4.8) | Third Quartile<br>(>4.8 & ≤6.7) | Fourth<br>Quartile (>6.7) |
|------------------------------------------------------------------------------------------------|---------------------------|-------------------------------------|---------------------------------|---------------------------|
| 50,000 - >100,000                                                                              | 8 (28.6)                  | 6 (21.4)                            | 5 (17.9)                        | 6 (22.2)                  |
| In a Committed<br>Relationship, no. (%)                                                        | 20 (69.0)                 | 15 (53.6)                           | 19 (65.5)                       | 13 (46.4)                 |
| Weight in kg                                                                                   |                           |                                     |                                 |                           |
| mean (SD)                                                                                      | 102.1 (23.4)              | 107.5 (29.5)                        | 95.1 (20.8)                     | 100.5 (20.2)              |
| median (Q1, Q3)                                                                                | 101.8 (78.6,<br>118.4)    | 98.1 (83.0,<br>129.0)               | 93.5 (80.1,<br>104.1)           | 99.3 (85.4,<br>115.6)     |
| n (min, max)                                                                                   | 29 (67.9,<br>150.6)       | 28 (70.4,<br>163.0)                 | 29 (62.7,<br>137.8)             | 28 (66.0,<br>141.3)       |
| BMI (kg/m <sup>2</sup> )                                                                       |                           |                                     |                                 |                           |
| mean (SD)                                                                                      | 34.7 (7.1)                | 38.3 (10.4)                         | 34.0 (7.8)                      | 35.3 (7.0)                |
| median (Q1, Q3)                                                                                | 32.6 (29.2,<br>39.7)      | 34.9 (28.9,<br>49.5)                | 32.2 (28.9,<br>37.4)            | 34.8 (29.0,<br>41.0)      |
| n (min, max)                                                                                   | 29 (26.2, 50.9)           | 28 (25.1, 62.4)                     | 29 (25.2, 52.8)                 | 28 (25.8, 47.8)           |
| Weekly energy expenditure<br>in leisure time phys.<br>activity that includes stairs<br>climbed |                           |                                     |                                 |                           |
| mean (SD)                                                                                      | 1,099.5<br>(1,212.1)      | 1,030.7<br>(1,736.7)                | 980.2<br>(1,268.3)              | 1,109.5<br>(1,397.5)      |
| median (Q1, Q3)                                                                                | 612.0 (344.0,<br>1,394.5) | 188.0 (84.0,<br>1,016.0)            | 576.4 (112.0,<br>979.3)         | 659.5 (192.0,<br>1,548.0) |

Multimedia Appendix 2. Baseline characteristics of Cell Phone participants by quartile of mean number of apps used per day (including self-weighing)<sup>a</sup> in first six months

|                                     | First Quartile<br>(≤3.2) | Second<br>Quartile (>3.2<br>& ≤4.8) | Third Quartile<br>(>4.8 & ≤6.7) | Fourth<br>Quartile (>6.7) |
|-------------------------------------|--------------------------|-------------------------------------|---------------------------------|---------------------------|
| n (min, max)                        | 25 (0.0,<br>4,671.0)     | 21 (28.0,<br>6,103.0)               | 28 (0.0,<br>5,224.0)            | 27 (56.0,<br>5,928.0)     |
| HEI Score                           |                          |                                     |                                 |                           |
| mean (SD)                           | 51.0 (3.6)               | 52.5 (4.0)                          | 53.0 (5.2)                      | 50.5 (3.9)                |
| median (Q1, Q3)                     | 50.7 (48.6,<br>53.3)     | 51.7 (49.1,<br>54.9)                | 53.6 (48.0,<br>56.7)            | 51.1 (47.1,<br>52.9)      |
| n (min, max)                        | 26 (44.2, 59.8)          | 25 (45.4, 60.5)                     | 26 (45.2, 62.0)                 | 28 (42.3, 57.2)           |
| Hypertension <sup>b</sup> , no. (%) | 5 (17.2)                 | 6 (21.4)                            | 5 (17.2)                        | 3 (10.7)                  |

Abbreviations: CELL PHONE, Cell Phone Intervention; PC, Personal Coaching Intervention; SD, standard deviation; Q1, 1st quartile; Q3, 3rd quartile; BMI, body mass index; HEI, healthy eating index.

<sup>a</sup>This measure was calculated by taking the average (in the first six months) of a binary indicator for each participant of whether they used at least one app or not, then averaging this across all participants.

<sup>b</sup>Resting SBP > 140 or resting DBP > 90 or taking BP medication.
