# Supplementary material for: The Association Between Engagement and Weight Loss Through Personal Coaching and Cell Phone Interventions in Young Adults: Randomized Controlled Trial
Source: PubMed Central journal article supplement (PMC6245957; doi:10.2196/10471), 2018-10-18
Supplement: mhealth_v6i10e10471_app3.pdf [file mhealth_v6i10e10471_app3.pdf]

Multimedia Appendix 3. Baseline characteristics of Personal Coaching participants by quartile of mean number of app uses per day (including self-weighing)<sup>a</sup> in first six months

|                                 | First Quartile<br>(≤0.9) | Second<br>Quartile (>0.9<br>& ≤1.4) | Third Quartile<br>(>1.4 & ≤2.2) | Fourth<br>Quartile (>2.2) |
|---------------------------------|--------------------------|-------------------------------------|---------------------------------|---------------------------|
| Total, no.                      | 28                       | 27                                  | 28                              | 27                        |
| Age at Randomization<br>(years) |                          |                                     |                                 |                           |
| mean (SD)                       | 29.9 (4.3)               | 29.6 (4.5)                          | 28.6 (4.0)                      | 30.7 (3.7)                |
| median (Q1, Q3)                 | 30.2 (27.7,<br>33.7)     | 29.7 (26.5,<br>33.8)                | 28.2 (25.4,<br>31.5)            | 31.5 (27.7,<br>33.7)      |
| n (min, max)                    | 28 (20.4, 35.5)          | 27 (22.2, 35.7)                     | 28 (22.4, 35.8)                 | 27 (22.6, 35.9)           |
| Female, no. (%)                 | 18 (64.3)                | 17 (63.0)                           | 22 (78.6)                       | 18 (66.7)                 |
| Race Category, no. (%)          |                          |                                     |                                 |                           |
| White                           | 19 (67.9)                | 17 (63.0)                           | 13 (46.4)                       | 11 (40.7)                 |
| Black                           | 8 (28.6)                 | 9 (33.3)                            | 12 (42.9)                       | 14 (51.9)                 |
| Other                           | 1 (3.6)                  | 1 (3.7)                             | 3 (10.7)                        | 2 (7.4)                   |
| Race, no. (%)                   |                          |                                     |                                 |                           |
| White                           | 19 (67.9)                | 17 (63.0)                           | 13 (46.4)                       | 11 (40.7)                 |
| Non-white                       | 9 (32.1)                 | 10 (37.0)                           | 15 (53.6)                       | 16 (59.3)                 |
| Hispanic Ethnicity, no. (%)     | 1 (3.6)                  | 3 (11.1)                            | 2 (7.1)                         | 1 (3.7)                   |
| Education Level, no. (%)        |                          |                                     |                                 |                           |
| Some college or less            | 11 (39.3)                | 11 (40.7)                           | 15 (53.6)                       | 7 (25.9)                  |
| College Degree                  | 17 (60.7)                | 16 (59.3)                           | 13 (46.4)                       | 20 (74.1)                 |
| Income Category, no. (%)        |                          |                                     |                                 |                           |
| <24,999                         | 7 (25.0)                 | 8 (34.8)                            | 14 (50.0)                       | 4 (14.8)                  |
| 25,000 - 49,999                 | 12 (42.9)                | 8 (34.8)                            | 9 (32.1)                        | 14 (51.9)                 |

Multimedia Appendix 3. Baseline characteristics of Personal Coaching participants by quartile of mean number of app uses per day (including self-weighing)<sup>a</sup> in first six months

|                                                                                                | First Quartile<br>( $\leq 0.9$ ) | Second<br>Quartile ( $>0.9$<br>& $\leq 1.4$ ) | Third Quartile<br>( $>1.4$ & $\leq 2.2$ ) | Fourth<br>Quartile ( $>2.2$ ) |
|------------------------------------------------------------------------------------------------|----------------------------------|-----------------------------------------------|-------------------------------------------|-------------------------------|
| 50,000 - >100,000                                                                              | 9 (32.1)                         | 7 (30.4)                                      | 5 (17.9)                                  | 9 (33.3)                      |
| In a Committed<br>Relationship, no. (%)                                                        | 20 (71.4)                        | 19 (70.4)                                     | 15 (53.6)                                 | 14 (51.9)                     |
| Weight in kg                                                                                   |                                  |                                               |                                           |                               |
| mean (SD)                                                                                      | 102.1 (25.8)                     | 98.4 (19.5)                                   | 88.8 (18.8)                               | 106.2 (24.6)                  |
| median (Q1, Q3)                                                                                | 93.7 (83.8,<br>114.4)            | 97.8 (86.4,<br>111.3)                         | 83.6 (79.2,<br>93.8)                      | 103.3 (90.0,<br>119.1)        |
| n (min, max)                                                                                   | 28 (64.8,<br>165.5)              | 27 (64.5,<br>149.3)                           | 28 (64.1,<br>158.2)                       | 27 (71.0,<br>189.2)           |
| BMI (kg/m <sup>2</sup> )                                                                       |                                  |                                               |                                           |                               |
| mean (SD)                                                                                      | 34.7 (7.8)                       | 34.5 (7.4)                                    | 32.3 (5.9)                                | 36.9 (7.7)                    |
| median (Q1, Q3)                                                                                | 31.5 (29.4,<br>39.4)             | 33.9 (28.5,<br>39.3)                          | 31.2 (29.1,<br>33.4)                      | 34.0 (31.4,<br>40.9)          |
| n (min, max)                                                                                   | 28 (24.9, 52.9)                  | 27 (25.2, 58.9)                               | 28 (26.2, 57.5)                           | 27 (26.4, 56.2)               |
| Weekly energy<br>expenditure in leisure time<br>phys. activity that includes<br>stairs climbed |                                  |                                               |                                           |                               |
| mean (SD)                                                                                      | 814.9 (973.5)                    | 685.9 (874.4)                                 | 880.2 (790.9)                             | 739.7 (874.8)                 |
| median (Q1, Q3)                                                                                | 334.0 (146.0,<br>1,239.3)        | 316.0 (112.0,<br>914.0)                       | 636.5 (280.0,<br>1,312.0)                 | 387.0 (140.0,<br>1,001.0)     |
| n (min, max)                                                                                   | 24 (0.0,<br>3,562.0)             | 21 (0.0,<br>3,451.5)                          | 25 (28.0,<br>3,345.5)                     | 23 (0.0,<br>3,084.9)          |

Multimedia Appendix 3. Baseline characteristics of Personal Coaching participants by quartile of mean number of app uses per day (including self-weighing)<sup>a</sup> in first six months

|                                     | First Quartile<br>(≤0.9) | Second<br>Quartile (>0.9<br>& ≤1.4) | Third Quartile<br>(>1.4 & ≤2.2) | Fourth<br>Quartile (>2.2) |
|-------------------------------------|--------------------------|-------------------------------------|---------------------------------|---------------------------|
| HEI Score                           |                          |                                     |                                 |                           |
| mean (SD)                           | 50.6 (3.2)               | 50.3 (4.1)                          | 51.7 (3.2)                      | 50.4 (3.0)                |
| median (Q1, Q3)                     | 50.6 (47.2,<br>53.1)     | 50.7 (46.9,<br>52.5)                | 51.9 (49.7,<br>53.2)            | 50.1 (48.1,<br>52.7)      |
| n (min, max)                        | 27 (45.2, 56.4)          | 27 (43.5, 59.8)                     | 27 (44.3, 57.1)                 | 24 (44.7, 57.0)           |
| Hypertension <sup>a</sup> , no. (%) | 4 (14.3)                 | 6 (22.2)                            | 3 (10.7)                        | 5 (18.5)                  |

Abbreviations: CELL PHONE, Cell Phone Intervention; PC, Personal Coaching Intervention; SD, standard deviation; Q1, 1st quartile; Q3, 3rd quartile; BMI, body mass index; HEI, healthy eating index.

<sup>a</sup>This measure was calculated by taking the average (in the first six months) of a binary indicator for each participant of whether they used at least one app or not, then averaging this across all participants.

<sup>b</sup>Resting SBP > 140 or resting DBP > 90 or taking BP medication.
